# Supplementary material
Source: PubMed Central journal article supplement (PMC2788843)
Supplement: supp_M109.037218_jbc.M109.037218-1.pdf [file supp_M109.037218_jbc.M109.037218-1.pdf]

## Endo et al. Supplemental Fig. S1

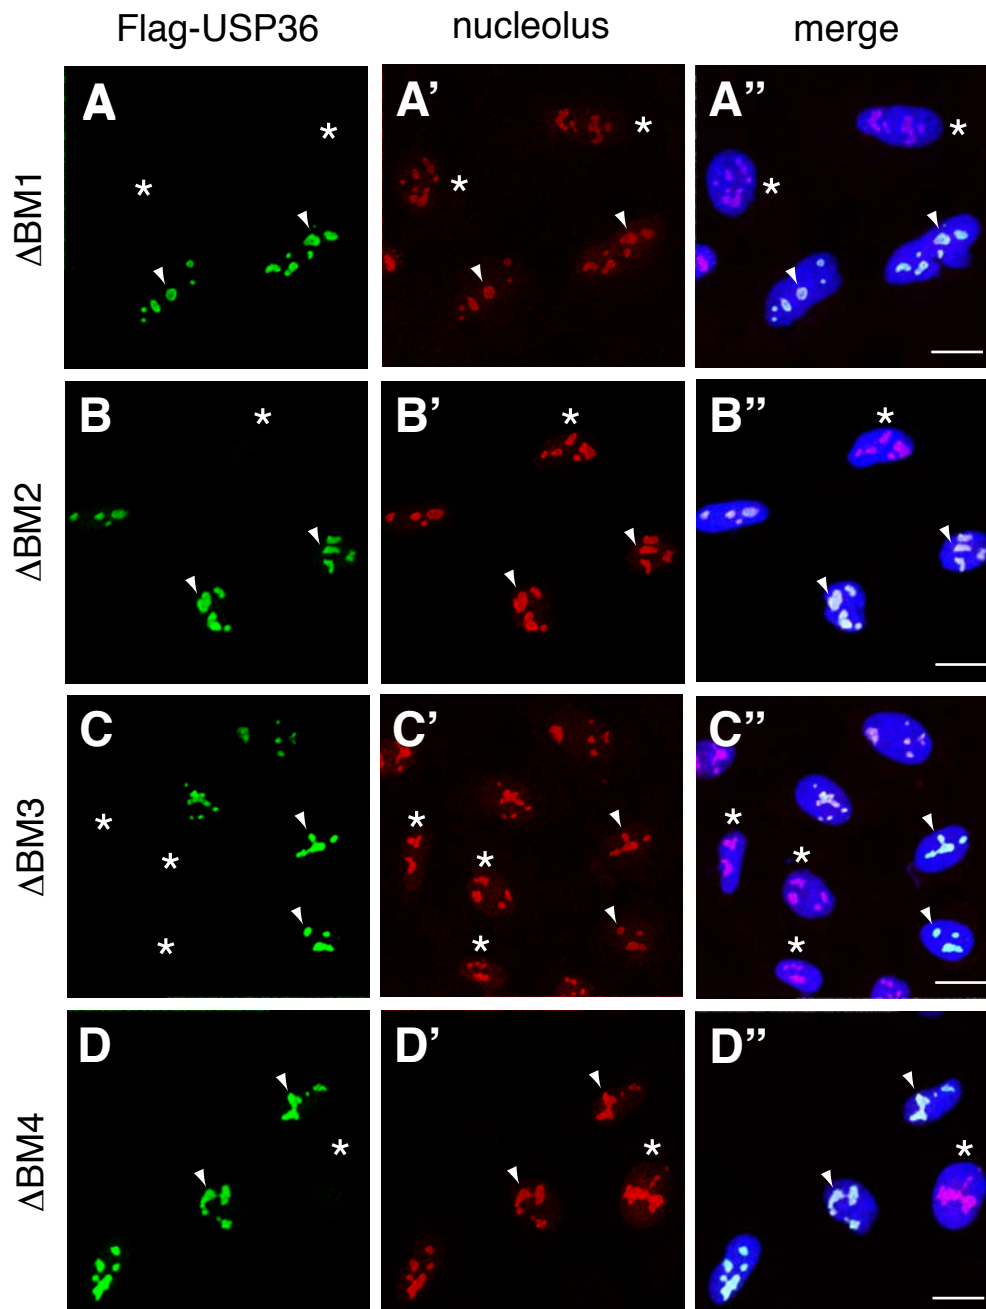

### **BMs 1~4 are dispensable for the nucleolar localization of USP36**

HeLa cells were transfected with Flag-tagged USP36 <sup>$\Delta\text{BM1}$</sup>  (A-A''), USP36 <sup>$\Delta\text{BM2}$</sup>  (B-B''), USP36 <sup>$\Delta\text{BM3}$</sup>  (C-C''), or USP36 <sup>$\Delta\text{BM4}$</sup>  (D-D''), and double-stained with anti-Flag (A-D) and anti-nucleolus (A'-D') antibodies. A''-D'' are merged images in which nuclei were also stained in blue. Arrowheads indicate typical nucleoli. Asterisks indicate untransfected cells. Scale bars: 20  $\mu\text{m}$ .
